# Supplementary material for: Visualization of Synovial Vascularization In a Preclinical Model of Arthritis Using [¹⁸F]Fluciclatide PET/CT: A Novel Integrin-Targeted Molecular Imaging Approach
Source: Research Square preprint supplement (doi:10.21203/rs.3.rs-8758693/v1), 2026-02-16
Supplement: Supplementary file 1 [file 842eb2237be645a0061e7949.docx]

**Biodistribution analysis of [¹⁸F]Fluciclatide with and without blocking (before normalization to blood uptake)**

Pre-normalization analysis (%ID/g) revealed that tracer uptake in the arthritic knee remained unchanged after blocking (0.29 ± 0.01 vs. 0.32 ± 0.03 %ID/g; p = 0.34), while the control knee showed a minor, non-significant increase (0.18 ± 0.01 vs. 0.20 ± 0.04 %ID/g; p = 0.06). In contrast, several peripheral tissues exhibited significantly reduced uptake following blocking, consistent with integrin-mediated accumulation **(Supplementary Fig. 1)**. In the spleen, uptake decreased from 0.32 ± 0.03 to 0.12 ± 0.01 %ID/g (p = 0.03), and in the liver from 0.23 ± 0.01 to 0.16 ± 0.01 %ID/g (p = 0.03). The colon and ileum also showed reduced uptake (colon: 0.50 ± 0.03 to 0.20 ± 0.08 %ID/g; ileum: 0.48 ± 0.05 to 0.20 ± 0.06 %ID/g; both p = 0.03), as did the stomach (0.33 ± 0.04 to 0.21 ± 0.02 %ID/g; p = 0.03), supporting integrin-targeted binding of the tracer in the gastrointestinal tract.

Notably, tracer activity in blood and serum significantly increased upon blocking (blood: 0.12 ± 0.00 to 0.37 ± 0.03 %ID/g; serum: 0.20 ± 0.00 to 0.64 ± 0.07 %ID/g; both p = 0.03), likely reflecting reduced tissue clearance and redistribution of unbound tracer when integrin sites are saturated. Bone showed a small but significant reduction (0.12 ± 0.01 to 0.09 ± 0.02 %ID/g; p = 0.03), while muscle uptake showed no significant change (0.07 ± 0.001 to 0.10 ± 0.04 %ID/g; p = 0.34) **(Supplementary Fig. 1)**.


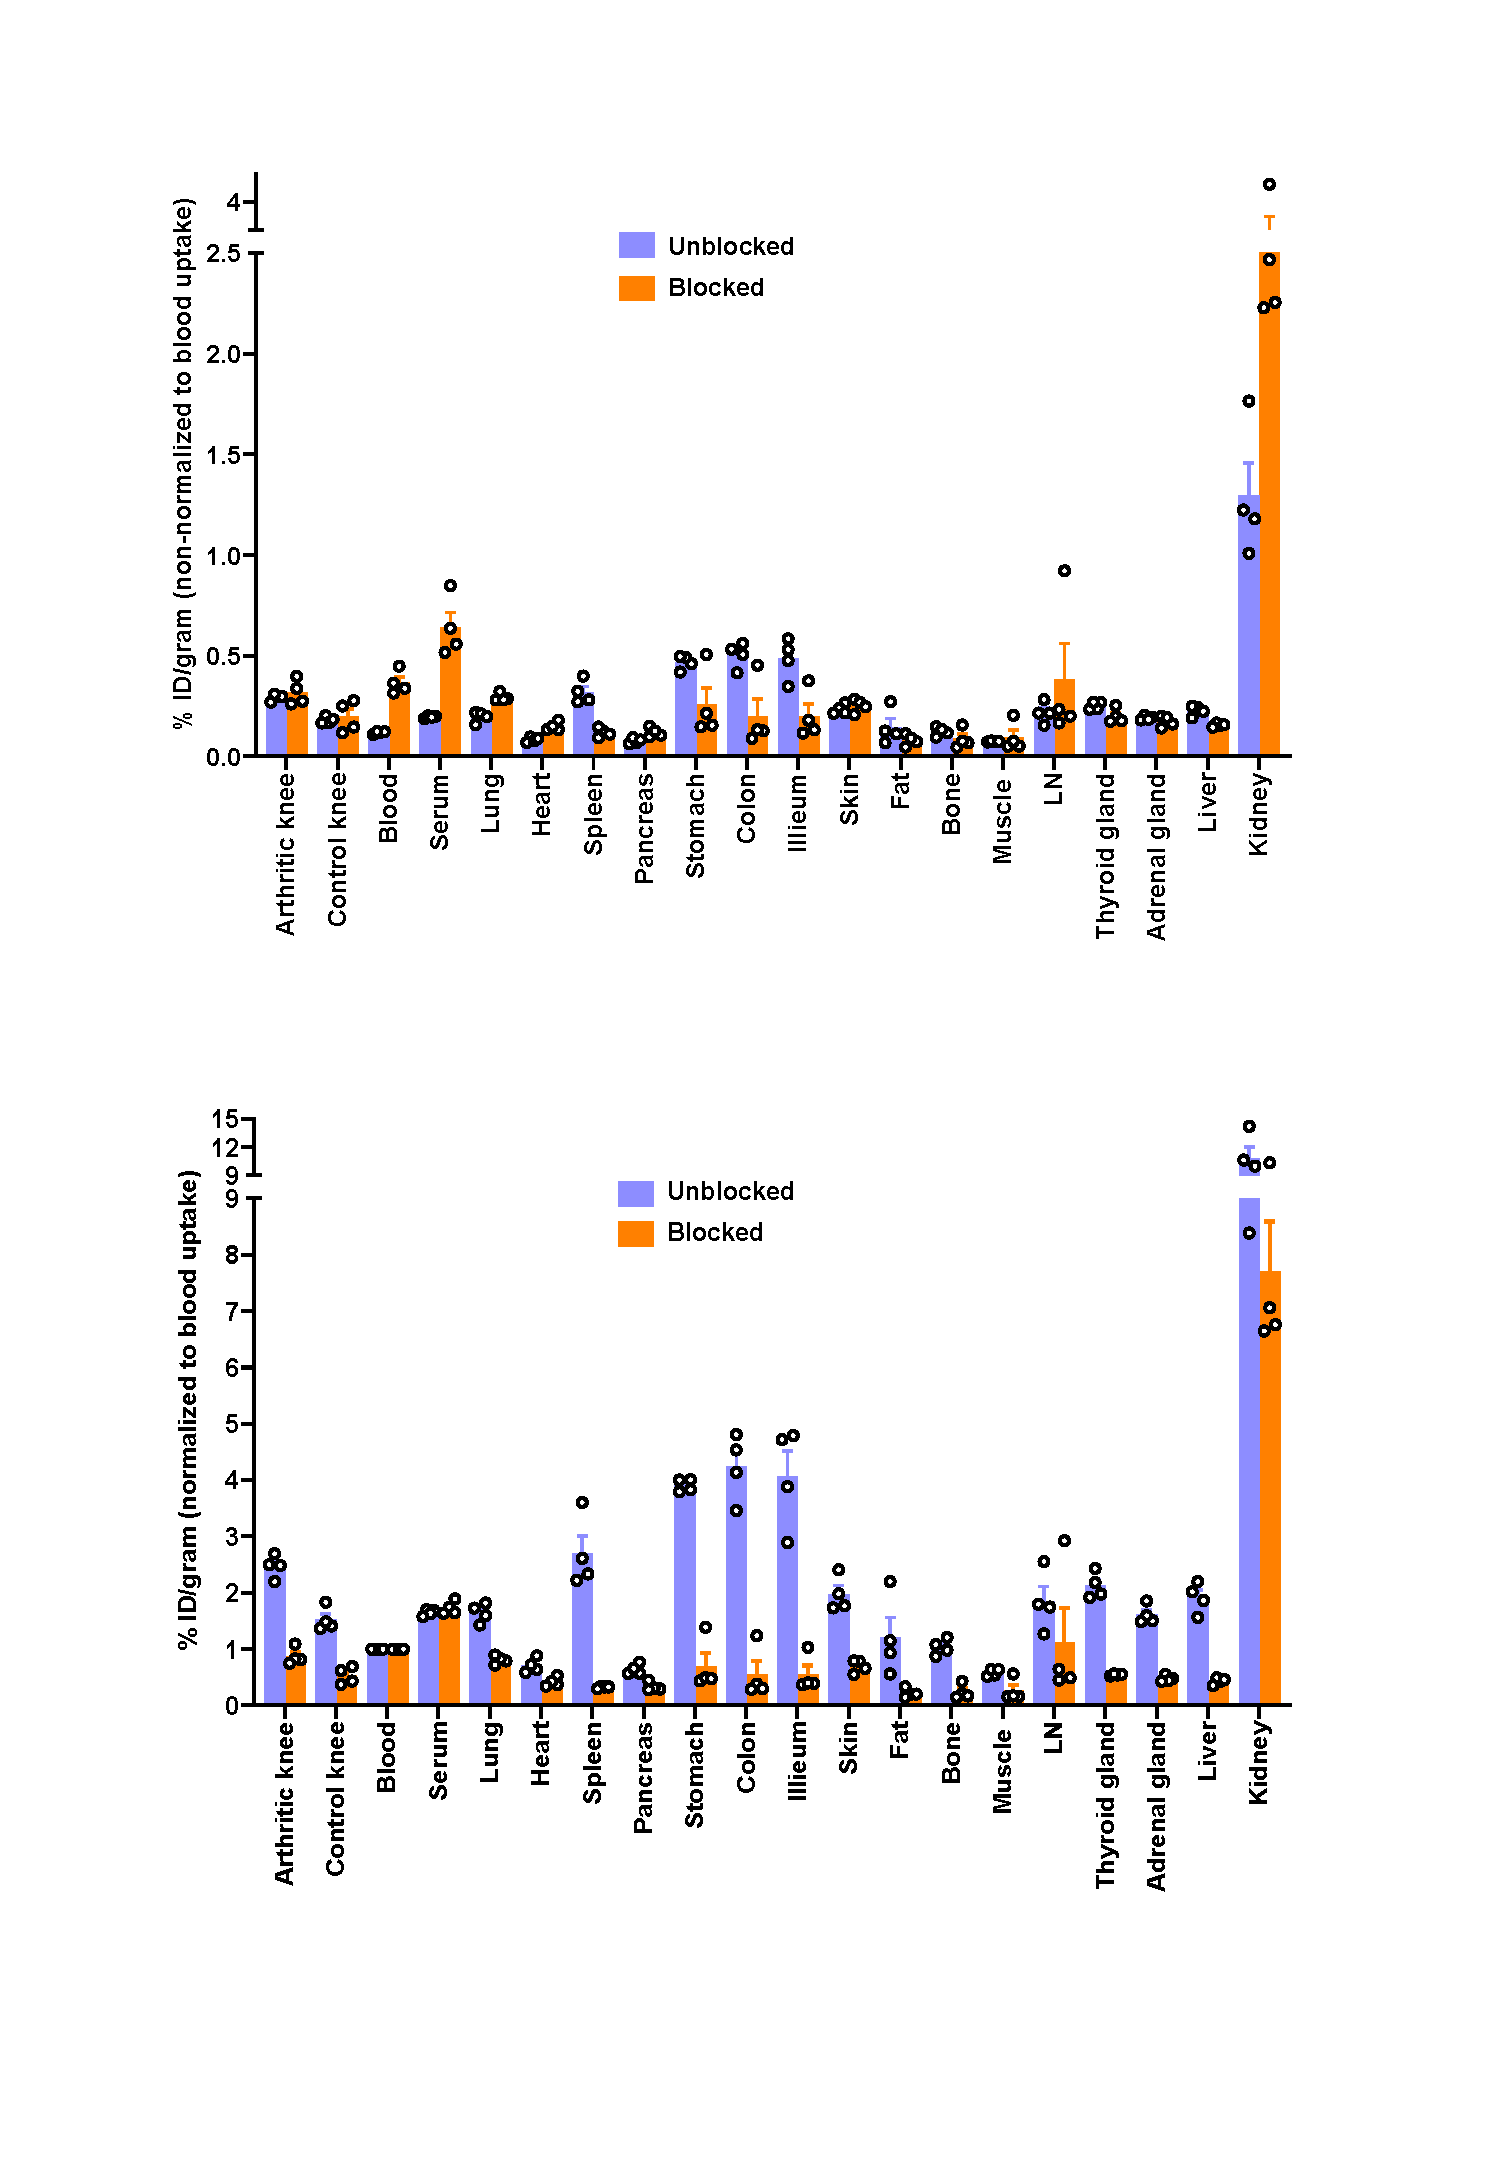


**Supplementary Fig. 1 Biodistribution of [18F]Fluciclatide in AIA rats with and without blocking (before normalization to blood uptake).** Biodistribution of [¹⁸F]Fluciclatide at 30 minutes post-injection, expressed as %ID/g (pre-normalization). Blocking condition (orange): Cilengitide was injected intravenously via the tail vein 15 minutes prior to tracer injection. Unblocked condition (blue): no pre-administration of Cilengitide. Data are shown as mean %ID/g values without normalization to blood. Tracer uptake remained unchanged in the arthritic knee (p = 0.5) and in the control knee (p = 0.7). Significant reductions in tracer uptake after blocking were observed in the spleen (p = 0.001), colon (p = 0.02), ileum (p = 0.01), thyroid gland (p = 0.04), and liver (p = 0.002). Tracer levels in blood (p = 0.0001), serum (p = 0.001), heart (p = 0.002), and lung (p = 0.001), and pancreas (p = 0.02) significantly increased after blocking. No significant changes were seen in the bone (p = 0.2), stomach (p = 0.051), fat (p = 0.2), adrenal gland (p = 0.3), lymph nodes (p = 0.4), skin (p = 0.4), and muscle (p = 0.6) Data are presented as mean ± SEM; unpaired two-tailed Student’s t-test after confirming normal distribution of differences (Shapiro-Wilk test, p > 0.05) (N = 4 per group).
